# Supplementary material for: Withania somnifera Reverses Transactive Response DNA Binding Protein 43 Proteinopathy in a Mouse Model of Amyotrophic Lateral Sclerosis/Frontotemporal Lobar Degeneration
Source: PubMed Central journal article supplement (PMC5398980; doi:10.1007/s13311-016-0499-2), 2016-12-07

## Supplementary Figures for the paper entitled “*Withania somnifera* reverses TDP-43 proteinopathy in a mouse model of ALS/FTLD”

*Kallol Dutta, Priyanka Patel, Reza Rahimian, Daniel Phaneuf and Jean-Pierre Julien*

### Legends

**Fig S1:** Figure shows the date of birth of all the animals that were used for the study.

Animals were randomly assigned numbers from the animal facility so as to mask identity of treatment group from experimenter. Animal #61-71 and 73-77 were male TDP43<sup>A315T</sup> mice which received Ashwagandha; # 87-91 and 93-101 were male TDP43<sup>A315T</sup> mice which received Vehicle; # 323, 324, 357, 366, 369, 384, 385, 392, 393 were female TDP43<sup>A315T</sup> mice which received Ashwagandha; and # 394, 397, 398, 400, 410, 411, 416, 417, 419, 425 were female TDP43<sup>A315T</sup> mice which received Vehicle.

**Figure S2:** Cytokine array performed from culture supernatant of wild-type (WT) and TDP43<sup>A315T</sup> primary microglia treated either with DMSO or LPS (100 ng/mL) did not show any variation where each dot represents one cytokine. The 4 dots on upper left corner are the 4 positive controls with which data are normalized. As can be clearly visualized, corresponding dots in either DMSO-treated or LPS-treated groups did not show any inter-group variation, thereby indicating WT as well as TDP43<sup>A315T</sup> behave similarly *in vitro* (a). Body weight records of ASH and Veh-treated TDP43<sup>A315T</sup> male and female mice shows males were considerably heavier. However, ASH treatment did not elicit any change in body weight (b). Basal rotarod performance record of non-transgenic (wild-type) mice (3 male; 3 female) recorded over a period of 6 months. Age of the animals is similar to that of those utilized for our study (c). The beneficial effect of ASH

on nuclear redistribution of hTDP-43 was also observed in brain cortical neurons (d-e). Magnification = 63X; scale = 10 $\mu$ . Immunoblotting also revealed a marked reduction of peripherin levels in spinal cord lysates of ASH-treated transgenic mice when compared to age and sex-matched controls. However, females had higher levels of peripherin, irrespective of treatment, than males (f).

Fig S1

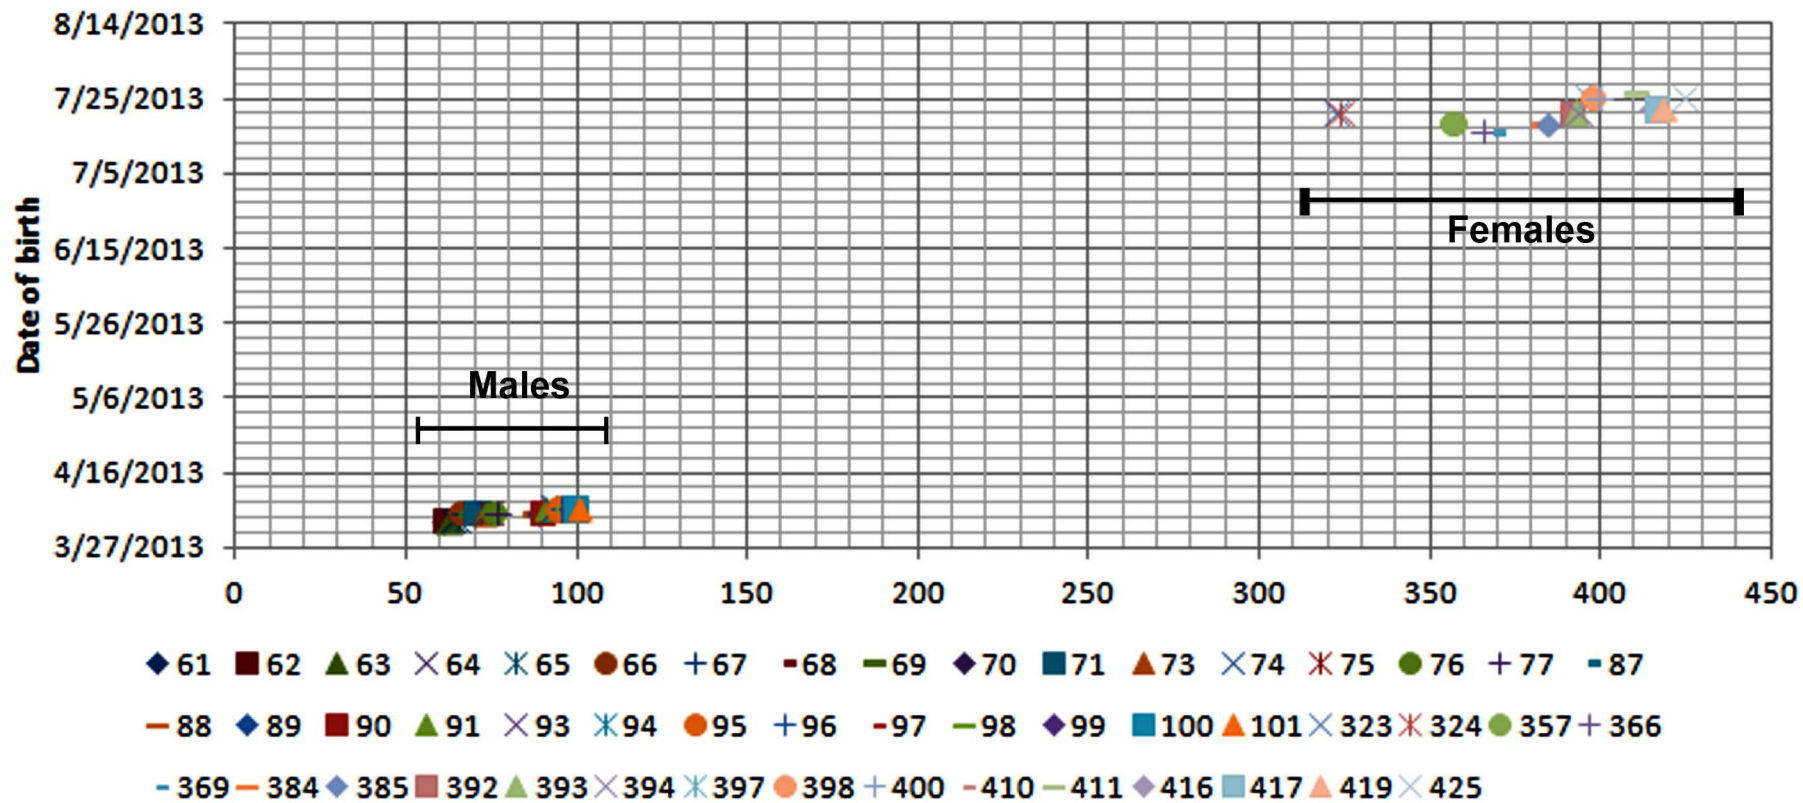

Fig S2

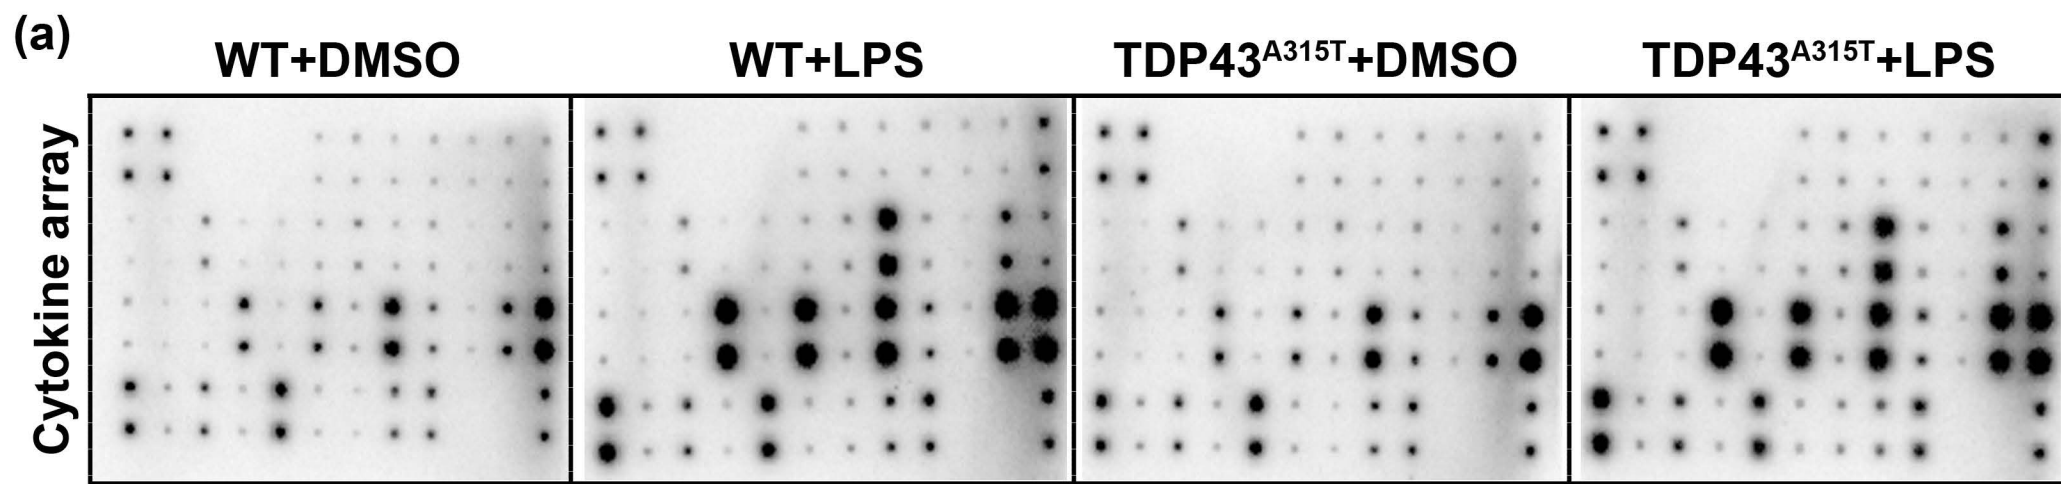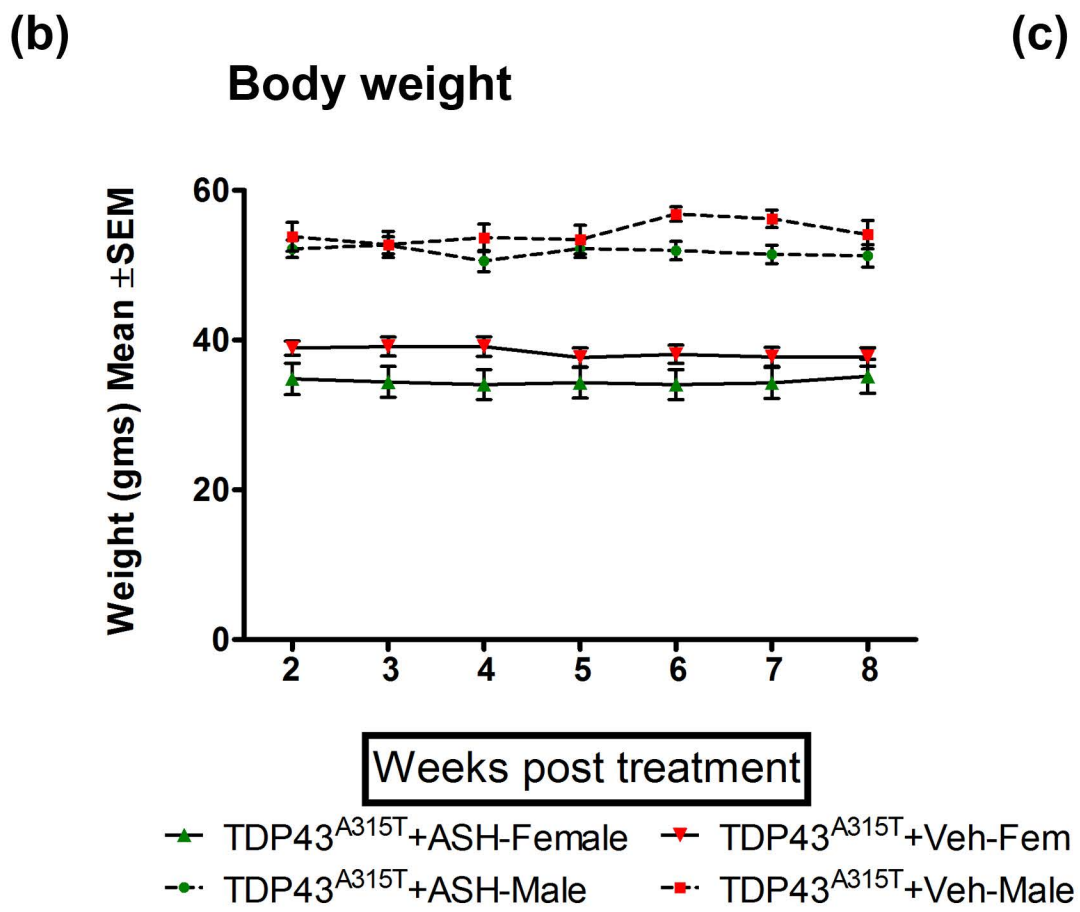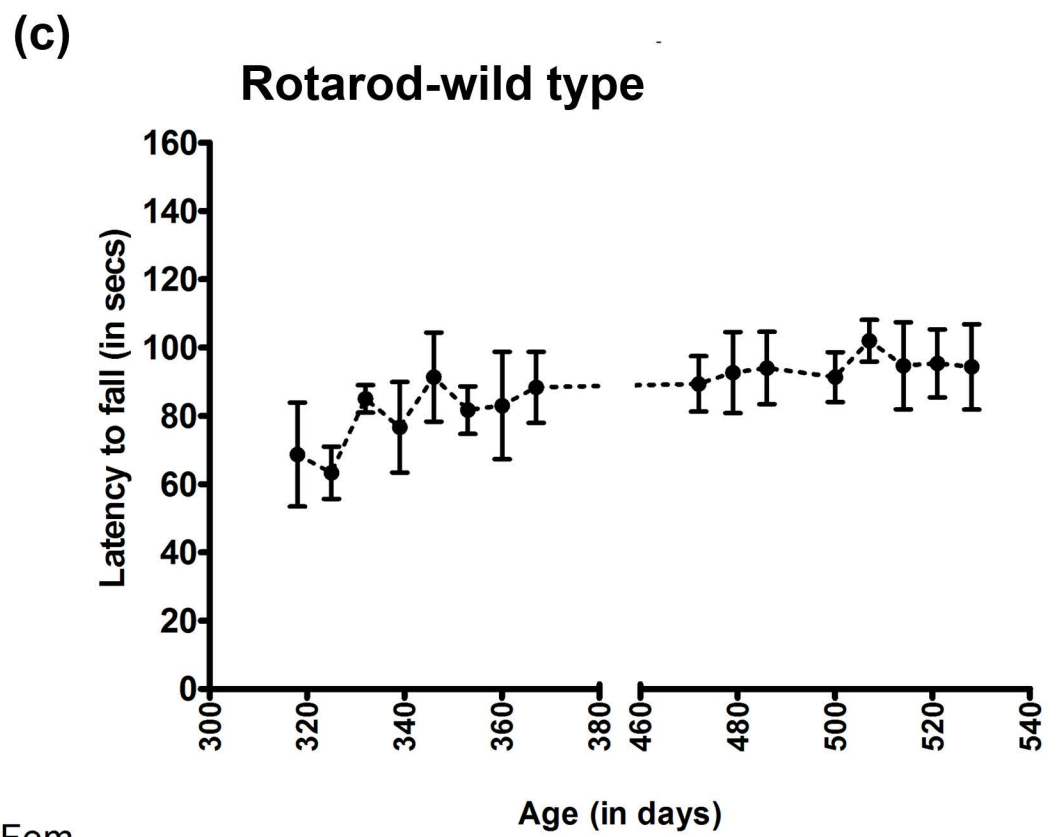

TDP43<sup>A315T</sup> + ASH

TDP43<sup>A315T</sup> + Veh

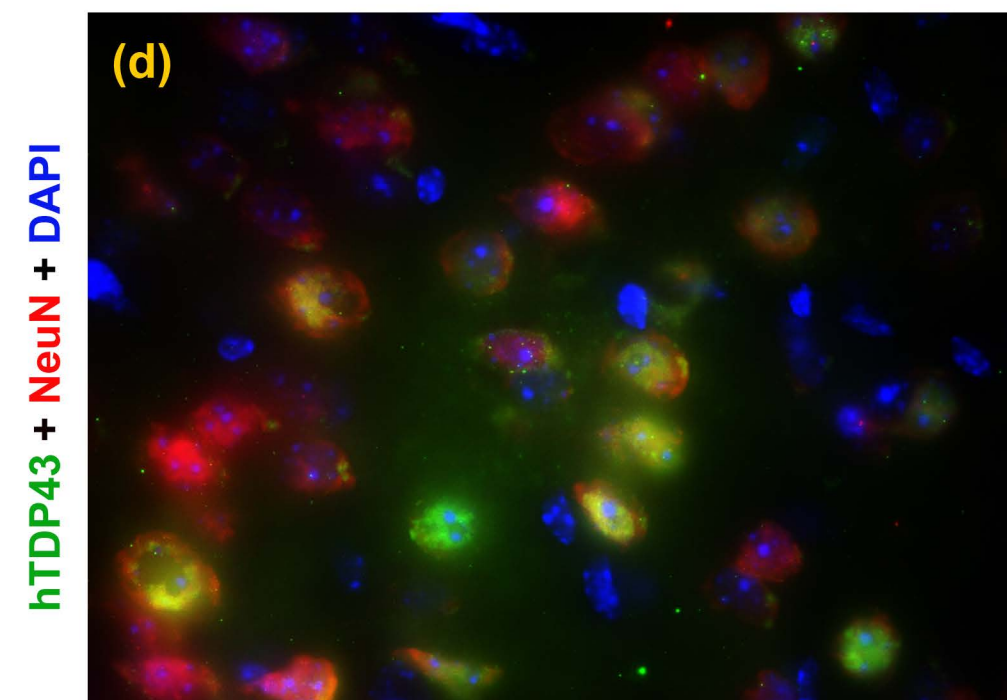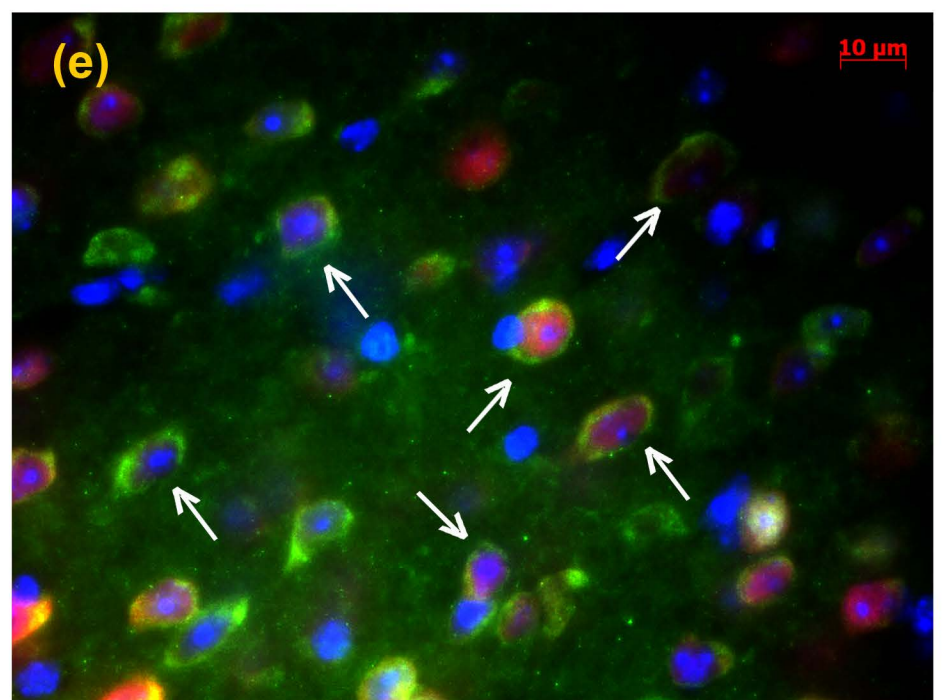

Brain cortex

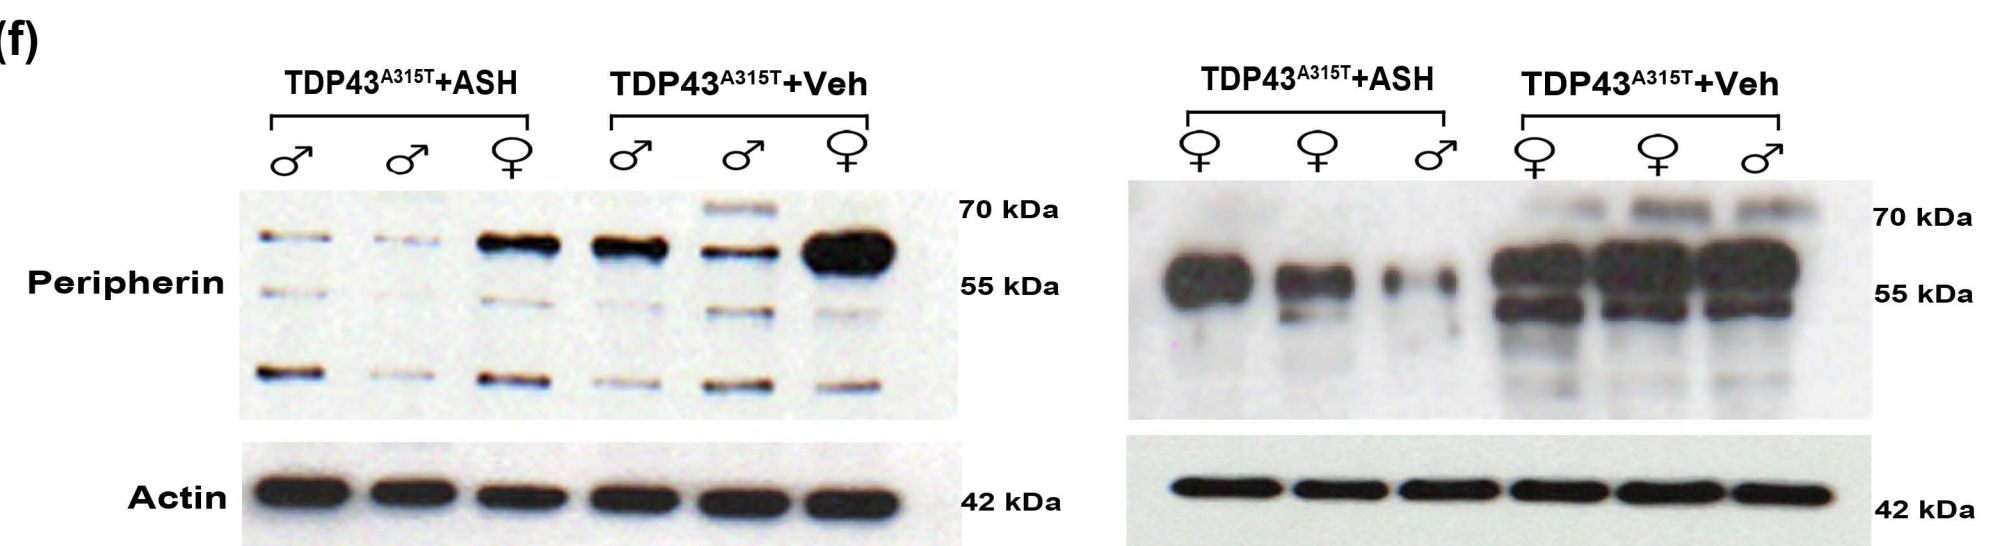

Supplement: 13311_2016_499_MOESM1_ESM.pdf [file 13311_2016_499_MOESM1_ESM.pdf]
