# Supplementary material for: Withania somnifera Reverses Transactive Response DNA Binding Protein 43 Proteinopathy in a Mouse Model of Amyotrophic Lateral Sclerosis/Frontotemporal Lobar Degeneration
Source: PubMed Central journal article supplement (PMC5398980; doi:10.1007/s13311-016-0499-2), 2016-12-07
Supplement: 13311_2016_499_MOESM2_ESM.pdf [file 13311_2016_499_MOESM2_ESM.pdf]

Avertissement : ce formulaire n'est pas pris en charge par la version actuelle d'Acrobat ou d'Adobe Reader.  
Mise à niveau vers la dernière version pour une prise en charge complète.
